# Supplementary material for: Long-term efficacy and safety of carotid artery stenting versus endarterectomy: A meta-analysis of randomized controlled trials
Source: PubMed Central journal article supplement (PMC5510818; doi:10.1371/journal.pone.0180804), 2017-07-14
Supplement: pone.0180804.s010.pdf [file pone.0180804.s010.pdf]

S1 Table. Other characteristics of included randomized controlled trials.

| Trial           | Male, % |      | Hypertension, % |      | Hyperlipidemia, % |      | Smoking, % |      | Diabetes, % |      | CHD, % |      |
|-----------------|---------|------|-----------------|------|-------------------|------|------------|------|-------------|------|--------|------|
|                 | CAS     | CEA  | CAS             | CEA  | CAS               | CEA  | CAS        | CEA  | CAS         | CEA  | CAS    | CEA  |
| ACT I           | 61.2    | 56.9 | 90.6            | 89.6 | 90                | 87.9 | 73.7       | 71.2 | 35.6        | 32.4 | 53.4   | 51.1 |
| CREST           | 65.2    | 66.5 | 85.8            | 86.1 | 82.9              | 85.8 | 26.4       | 26.1 | 30.6        | 30.4 | 42.4   | 45   |
| ICSS            | 70.5    | 70.7 | 69              | 70   | 61                | 66   | 72         | 71   | 22          | 22   | 18     | 18   |
| EVA-3S          | 77.9    | 72.8 | 72              | 72   | 56                | 58   | 23         | 25   | 26          | 22   | 13     | 11   |
| BACASS          | 80.0    | 90.0 | 70              | 80   | 70                | 60   | 50         | 60   | 30          | 30   | 20     | 40   |
| Markus, et al   | 69.3    | 70.4 | 79.1            | 77.3 | 51.2              | 52.3 | 44.2       | 40.9 | 44.2        | 34.1 | 41.9   | 45.5 |
| Kentucky, et al | NA      | NA   | 84.9            | 94.1 | 64.2              | 47.1 | 71.7       | 78.4 | 35.8        | 23.5 | 73.6   | 60.8 |
| CAVATAS         | NA      | NA   | 53              | 58   | 34                | 32   | 77         | 78   | 14          | 13   | 19     | 17   |

CAD: Coronary artery disease; CAS: Carotid Artery Stenting; CEA: Carotid Endarterectomy; ACT I: Asymptomatic Carotid Trial I; CREST: Carotid Revascularization Endarterectomy vs. Stenting Trial; ICSS: International Carotid Stenting Study; EVA-3S: Endarterectomy Versus Angioplasty in Patients with Symptomatic Severe Carotid Stenosis; BACASS: BASel Carotid Artery Stent Study; CAVATAS: Carotid and Vertebral Artery Transluminal Angioplasty Study.
